# Supplementary material for: Structural and mechanistic insights into UHRF1-mediated DNMT1 activation in the maintenance DNA methylation
Source: PubMed Central journal article supplement — Nucleic Acids Res. 2018 Feb 19;46(6):3218–31. doi: 10.1093/nar/gky104 (PMC5887372; doi:10.1093/nar/gky104), 2018-02-19

## SUPPLEMENTARY MATERIALS

### Supplementary Figure Legends

**Figure S1.** (A)  $^{15}\text{N}$  HSQC spectra show ubiquitin binds to DNMT1\_351 domain (aa: 351-1616), as illustrated by the severe line broadening effect caused by the addition of DNMT1\_351 domain. (B) Reciprocal NMR titration confirms the interaction of ubiquitin with DNMT1 RFTS domain (aa: 351-600). Superimposition of  $^{15}\text{N}$  HSQC spectra showing a large group of RFTS amide resonances have chemical shift perturbations or line broadening effect upon addition of ubiquitin. (C) Structure superimposition of UHRF1 N-terminal UBL domain (PDB: 2FAZ) and ubiquitin (PDB: 1UBQ) gives an RMSD 0.52 Å. (d)  $^{15}\text{N}$  HSQC spectra show UHRF1 UBL binds to DNMT1\_351 domain (aa: 351-1616.) (e) Reciprocal NMR titration confirms DNMT1 RFTS domain binds to UHRF1 UBL.

**Figure S2.** (A) DNMT1 RFTS domain and ubiquitin form a complex with 1:2 stoichiometry, as confirmed by SDS-PAGE gel analysis of the crystal of the RFTS/ubiquitin complex. This result is consistent with the structural data and ITC titration results. (B) The RFTS long loop encompassing residues 386-404, which is invisible in previous reported structures (PDB: 4WXX or 3AV4, in the figure the human DNMT1 structure with PDB code 4WXX was selected for the comparison and colored in gray) but now well-defined in our structure, is sandwiched by two ubiquitin molecules as highlighted in red rectangular box. (C) Surface representations of the RFTS/ubiquitin complex with structural domains colored with the same scheme as shown in Figure 2a. (D) Electrostatic surface potential representation of ubiquitin in complex with cartoon model of DNMT1 RFTS domain. (E) Electrostatic surface potential representation of DNMT1 RFTS in complex with cartoon model of ubiquitin molecules.

**Figure S3.** Structural superimposition of the  $\alpha$ -helical bundle (aa: 500-589) of human DNMT1 RFTS domain (PDB: 4WXX, colored in gray) with that of RFTS-ubiquitin complex (color in green/marine/cyan) gives an RMSD of 0.95 Å. However, the relative orientation of  $\beta$ -barrel has shifted obviously due to the bending of  $\alpha$ -helix (aa: 493-518),

suggesting RFTS domain undergoes conformational changes upon ubiquitin binding.

**Figure S4. Relative quantification of total 5mC levels in the genomic DNA of mouse ES cells by ELISA-based methylated DNA quantification kit.** (A) The relative 5-methylcytosine levels in the genomic DNA of wild-type ES cells, DNMT1<sup>-/-</sup> ES cells or DNMT1<sup>-/-</sup> ES cells stably expressing DNMT1 wild-type, E384A, E397A, E384A/E397A or Y339G point mutant respectively. (B) The relative 5-methylcytosine levels in the genomic DNA of wild-type control or UHRF1<sup>-/-</sup> mouse ES cells or UHRF1<sup>-/-</sup> ES cells stably expressing UHRF1 wild-type, UHRF1-ΔUBL or UHRF1-ΔRING truncated mutants respectively. Data are represented as mean ± SEM. Significant changes compared with wild type control are indicated as asterisk (p-value <0.05), calculated by two-paired t-test.

# Supplementary Figure 1

**A**

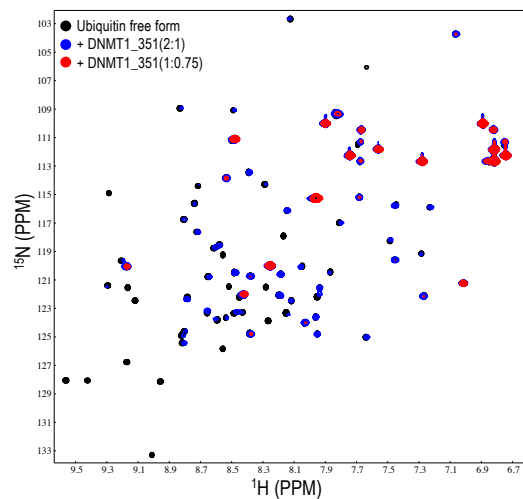

**B**

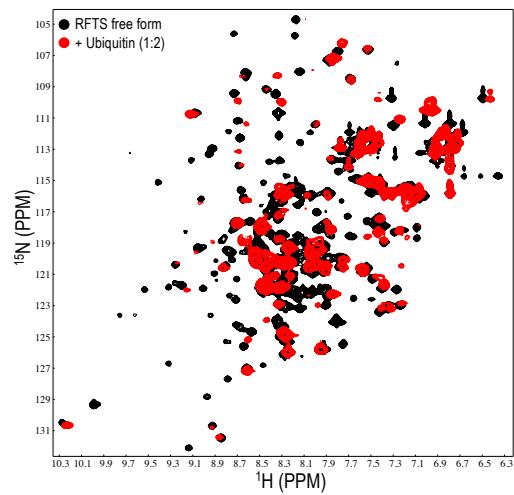

**C**

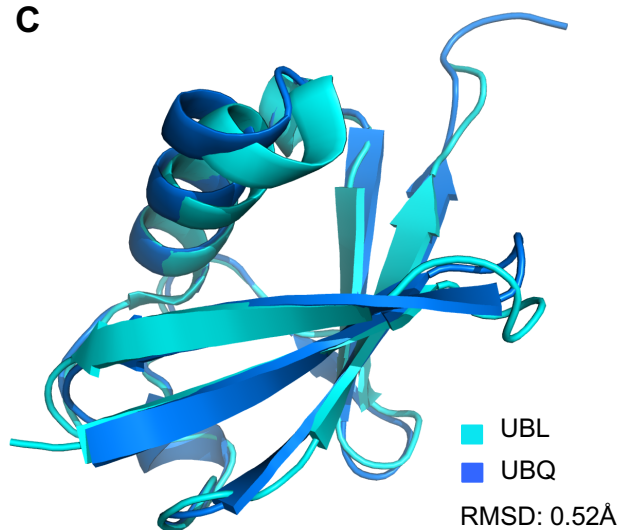

**D**

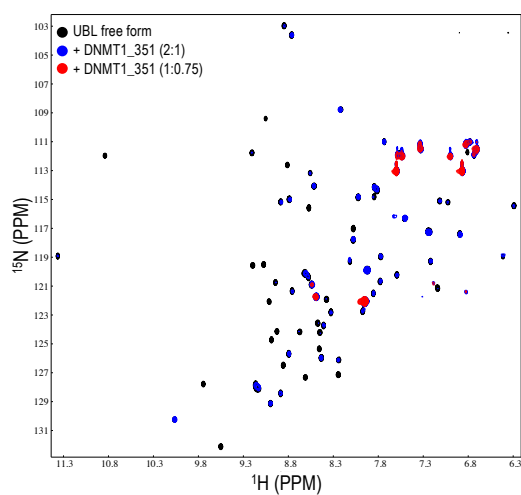

**E**

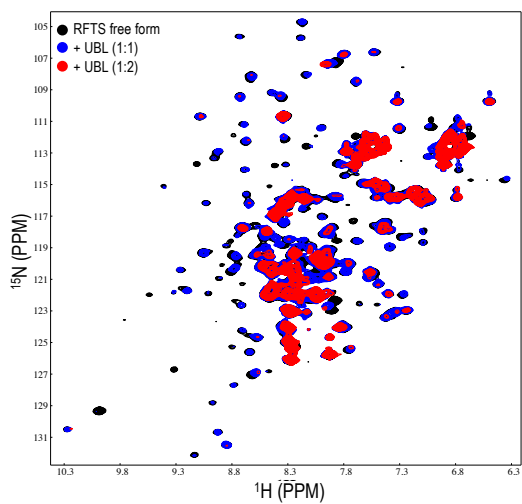

## Supplementary Figure 2

**A**

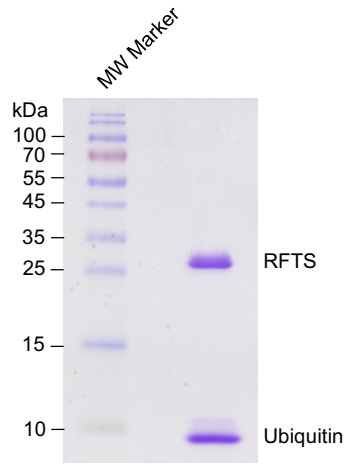

**B**

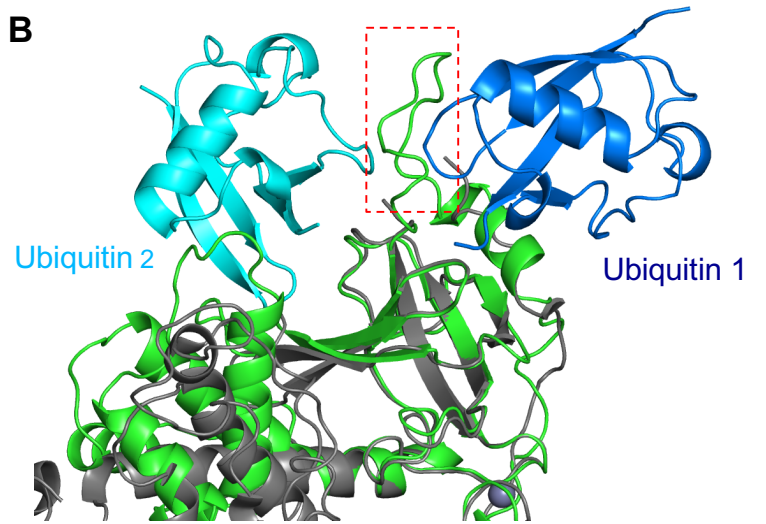

**C**

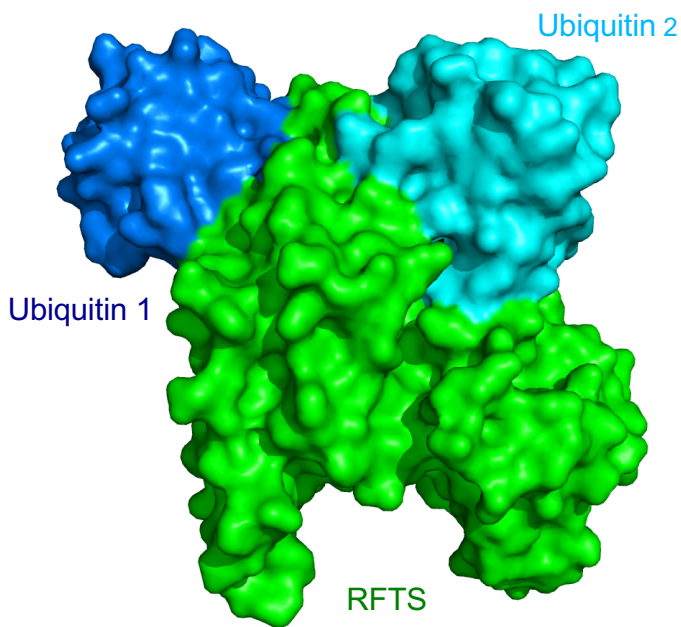

**D**

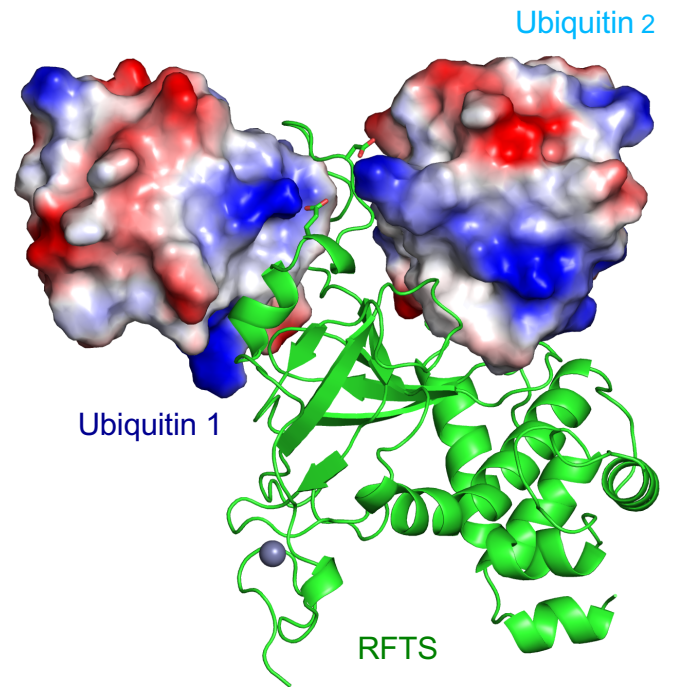

**E**

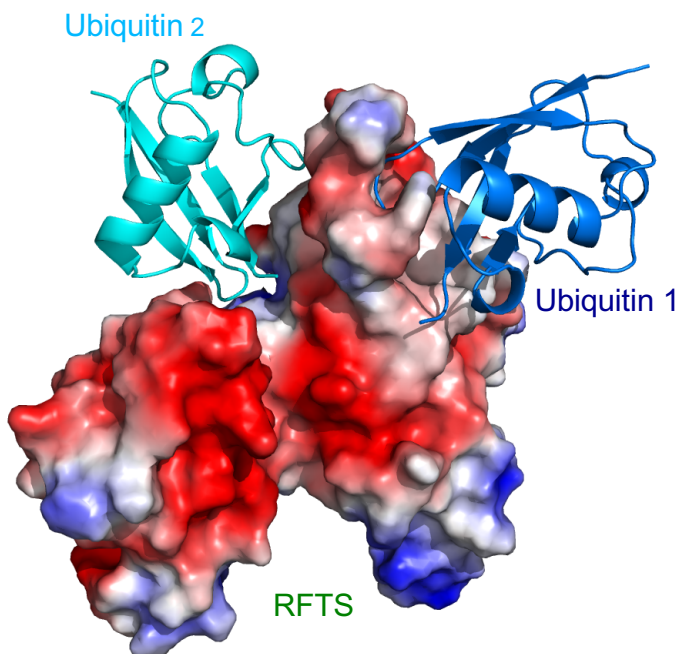

Supplementary Figure 3

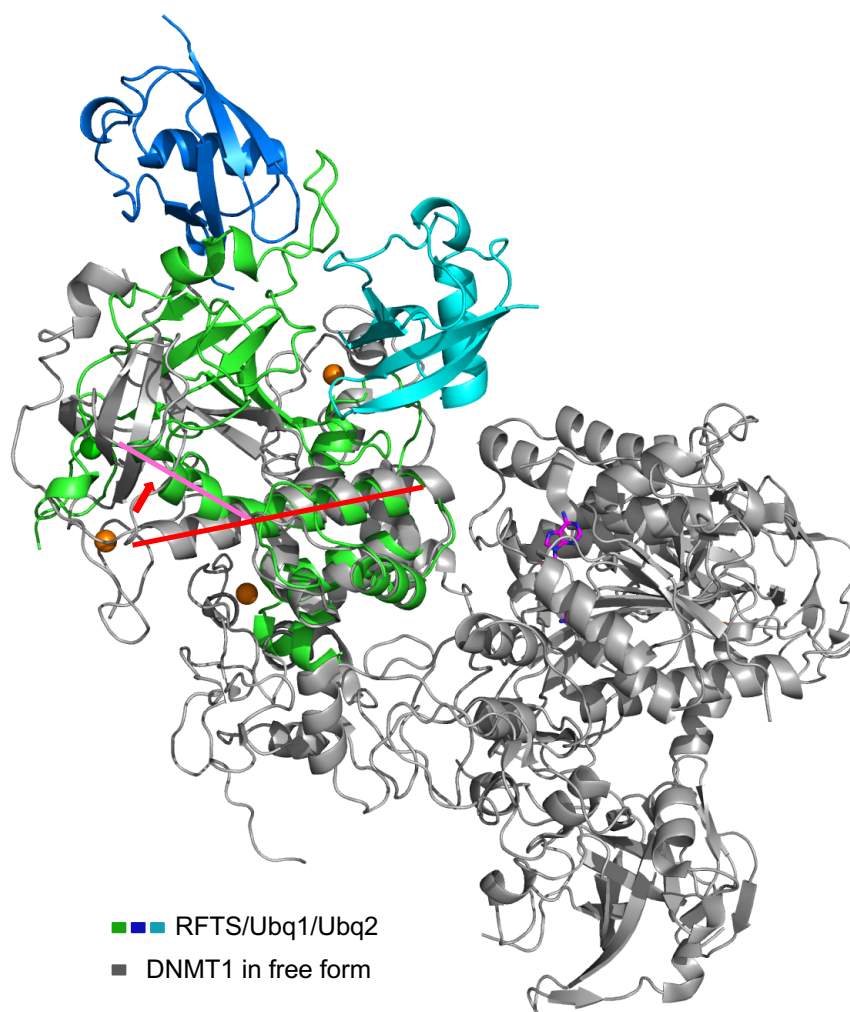

Supplementary Figure 4

**A**

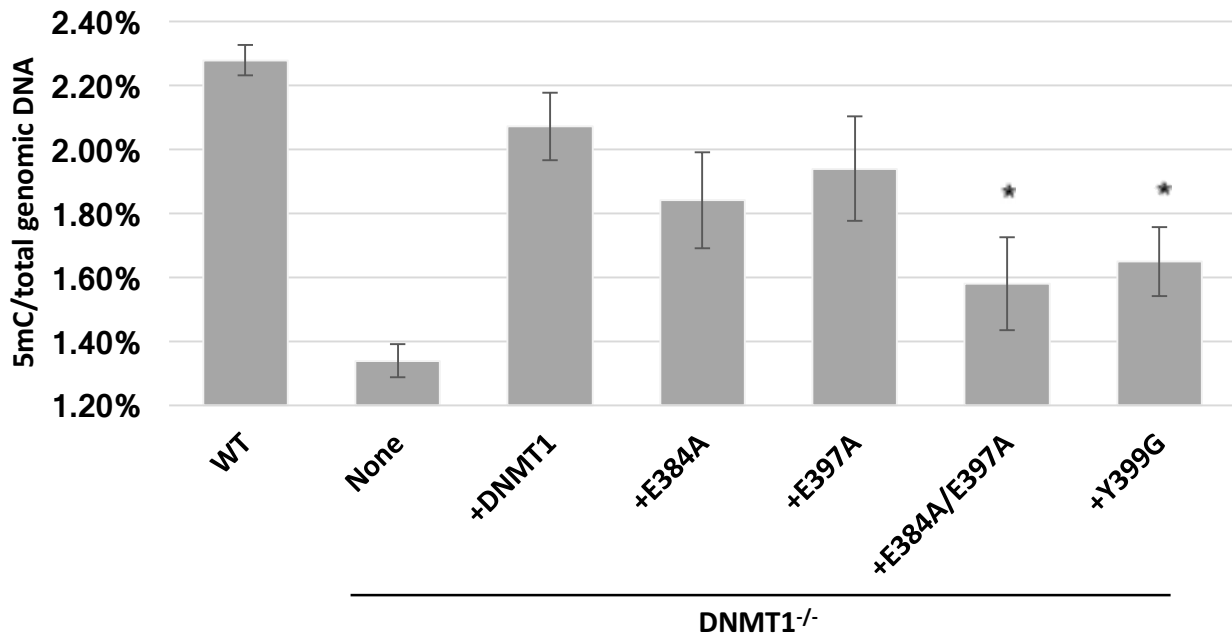

**B**

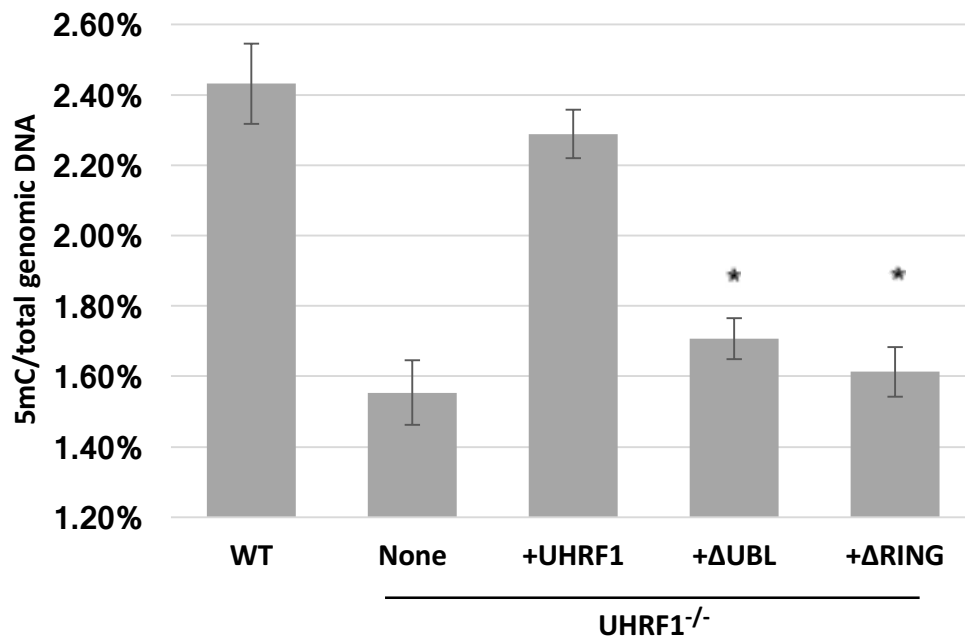

Supplement: gky104_supp.pdf [file gky104_supp.pdf]
